# Supplementary material for: Clinical Outcomes of Early Phenotype-Desirable Antimicrobial Therapy for Enterobacterales Bacteremia
Source: PubMed Central journal article supplement — JAMA Netw Open. 2024 Dec 23;7(12):e2451633. doi: 10.1001/jamanetworkopen.2024.51633 (PMC11667351; doi:10.1001/jamanetworkopen.2024.51633), 2024-12-23
Supplement: jamanetwopen-e2451633-s001.pdf [file jamanetwopen-e2451633-s001.pdf]

## Supplemental Online Content

Moon RC, MacVane SH, David J, Morton JB, Rosenthal N, Claeys KC. Clinical outcomes of early phenotype-desirable antimicrobial therapy for *Enterobacterales* bacteremia. *JAMA Netw Open*. 2024;7(12):e2451633. doi:10.1001/jamanetworkopen.2024.51633

**eTable 1.** Code Types and Values for Clinical Conditions

**eTable 2.** Charlson-Deyo comorbidities and Related Diagnosis and Procedure Codes

**eFigure 1.** Flowchart of Patient Selection

**eFigure 2.** Standardized Mean Differences Before and After Inverse Probability Weighting Using Propensity Score

**eFigure 3.** First Effective Antibiotic(s) Received, Among Patients Receiving PDAT

**eFigure 4.** Grid Illustrating the Desirability of Outcome Ranking for the Management of Antimicrobial Therapy (DOOR-MAT) for the Treatment of Bloodstream Infections Caused by *Escherichia coli*, *Klebsiella oxytoca*, *Klebsiella pneumoniae*, or *Proteus mirabilis*

This supplemental material has been provided by the authors to give readers additional information about their work.

**eTable 1. Code Types and Values for Clinical Conditions**

| <b>Conditions</b>                         | <b>Code Type</b> | <b>Code Value</b>                                             |
|-------------------------------------------|------------------|---------------------------------------------------------------|
| <i>Clostridioides difficile</i> infection | ICD-10-CM        | A04.7%                                                        |
| Acute kidney injury                       | ICD-10-CM        | N17%                                                          |
| Renal replacement therapy                 | ICD-10-PCS       | 5A1D70Z, 5A1D80Z, 5A1D90Z                                     |
|                                           | CPT              | 90935, 90937, 90940, 90945, 90947, 90969, 90970, 90997, 90999 |
|                                           | Dx               | S9335, S9339, Z6004, Z6006, Z6020                             |
| Invasive mechanical ventilator use        | ICD-10-PCS       | 5A1935Z, 5A1945Z, 5A1955Z, 0B21XEZ, 0BH13EZ, 0BH17EZ, 0BH18EZ |
|                                           | CPT              | 31500                                                         |
|                                           | HCPCS            | A4483                                                         |

ICD-10-CM: International Classification of Diseases, 10th Revision, Clinical Modification

ICD-10-PCS: ICD-10-CM: International Classification of Diseases, 10th Revision, Procedure Coding System

CPT: Current Procedural Terminology

HCPCS: Healthcare Common Procedure Coding System

**eTable 2. Charlson-Deyo comorbidities and Related Diagnosis and Procedure Codes**

| Comorbidity                                                                        | Code Type | Code Values                                                                                                                                                                                                                                                                                                                                                                                                                                                                                                                                                                                                                                                                                                                  |
|------------------------------------------------------------------------------------|-----------|------------------------------------------------------------------------------------------------------------------------------------------------------------------------------------------------------------------------------------------------------------------------------------------------------------------------------------------------------------------------------------------------------------------------------------------------------------------------------------------------------------------------------------------------------------------------------------------------------------------------------------------------------------------------------------------------------------------------------|
| Myocardial infarction                                                              | Dx        | I21.x, I22.x, I23.x, I25.2                                                                                                                                                                                                                                                                                                                                                                                                                                                                                                                                                                                                                                                                                                   |
| Congestive heart failure                                                           | Dx        | I50.x                                                                                                                                                                                                                                                                                                                                                                                                                                                                                                                                                                                                                                                                                                                        |
| Peripheral vascular disease                                                        | Dx        | I73.9, I71.00, I71.01, I71.02, I71.03, I71.1, I71.2, I71.3, I71.4, I71.5, I71.6, I71.8, I71.9, I96, Z95.828                                                                                                                                                                                                                                                                                                                                                                                                                                                                                                                                                                                                                  |
|                                                                                    | Proc      | 04RK07Z, 04RK0JZ, 04RK0KZ, 04RK47Z, 04RK4JZ, 04RK4KZ, 04RL07Z, 04RL0JZ, 04RL0KZ, 04RL47Z, 04RL4JZ, 04RL4KZ, 04RM07Z, 04RM0JZ, 04RM0KZ, 04RM47Z, 04RM4JZ, 04RM4KZ, 04RN07Z, 04RN0JZ, 04RN0KZ, 04RN47Z, 04RN4JZ, 04RN4KZ, 04RP07Z, 04RP0JZ, 04RP0KZ, 04RP47Z, 04RP4JZ, 04RP4KZ, 04RQ07Z, 04RQ0JZ, 04RQ0KZ, 04RQ47Z, 04RQ4JZ, 04RQ4KZ, 04RR07Z, 04RR0JZ, 04RR0KZ, 04RR47Z, 04RR4JZ, 04RR4KZ, 04RS07Z, 04RS0JZ, 04RS0KZ, 04RS47Z, 04RS4JZ, 04RS4KZ, 04RT07Z, 04RT0JZ, 04RT0KZ, 04RT47Z, 04RT4JZ, 04RT4KZ, 04RU07Z, 04RU0JZ, 04RU0KZ, 04RU47Z, 04RU4JZ, 04RU4KZ, 04RV07Z, 04RV0JZ, 04RV0KZ, 04RV47Z, 04RV4JZ, 04RV4KZ, 04RW07Z, 04RW0JZ, 04RW0KZ, 04RW47Z, 04RW4JZ, 04RW4KZ, 04RY07Z, 04RY0JZ, 04RY0KZ, 04RY47Z, 04RY4JZ, 04RY4KZ |
| Cerebrovascular disease                                                            | Dx        | I60.x, I61.x, I62.x, I63.x, I65.x, I66.x, I67.x, I68.x, I69.x, G45.x                                                                                                                                                                                                                                                                                                                                                                                                                                                                                                                                                                                                                                                         |
| Dementia                                                                           | Dx        | F03.90, F01.50, F01.51, F03.91, F02.80, F02.81                                                                                                                                                                                                                                                                                                                                                                                                                                                                                                                                                                                                                                                                               |
| Chronic pulmonary disease                                                          | Dx        | J40, J41.0, J41.1, J44.9, J44.0, J41.8, J42, J43.9, J45.20, J45.21, J45.22, J44.1, J45.990, J45.991, J45.909, J45.998, J45.902, J45.901, J47.9, J47.1, J67.0, J67.1, J67.2, J67.3, J67.4, J67.5, J67.6, J67.7, J67.8, J67.9, J60, J61, J62.8, J63.0, J63.1, J63.2, J63.3, J63.4, J63.5, J63.6, J66.0, J66.1, J66.2, J66.8, J64, J68.4                                                                                                                                                                                                                                                                                                                                                                                        |
| Rheumatic disease                                                                  | Dx        | M32.10, M34.0, M34.1, M34.9, M33.20, M06.9, M05.00, M05.30, M05.60, M06.1, M05.10, M35.3                                                                                                                                                                                                                                                                                                                                                                                                                                                                                                                                                                                                                                     |
| Peptic ulcer disease                                                               | Dx        | K25.0, K25.1, K25.2, K25.3, K25.4, K25.5, K25.6, K25.7, K25.9, K26.0, K26.1, K26.2, K26.3, K26.4, K26.5, K26.6, K26.7, K26.9, K27.0, K27.1, K27.2, K27.3, K27.4, K27.5, K27.6, K27.7, K27.9, K28.0, K28.1, K28.2, K28.3, K28.4, K28.5, K28.6, K28.7, K28.9                                                                                                                                                                                                                                                                                                                                                                                                                                                                   |
| Mild liver disease                                                                 | Dx        | K70.30, K73.9, K73.0, K75.4, K73.2, K73.8, K74.0, K74.60, K74.69, K74.3, K74.4, K74.5                                                                                                                                                                                                                                                                                                                                                                                                                                                                                                                                                                                                                                        |
| Diabetes without chronic complication                                              | Dx        | E11.9, E10.9, E13.9, E11.65, E10.65, E13.65, E10.1x, E11.1x, E13.1x, E11.0x, E13.0x, E11.64x, E10.64x, E13.64x                                                                                                                                                                                                                                                                                                                                                                                                                                                                                                                                                                                                               |
| Diabetes with chronic complication                                                 | Dx        | E10.2x, E10.3x, E10.4x, E10.5x, E10.61x, E10.62x, E10.63x, E10.69, E10.8, E11.2x, E11.3x, E11.4x, E11.5x, E11.61x, E11.62x, E11.63x, E11.69, E11.8, E13.2x, E13.3x, E13.4x, E13.5x, E13.61x, E13.62x, E13.63x, E13.69, E13.8                                                                                                                                                                                                                                                                                                                                                                                                                                                                                                 |
| Hemiplegia or paraplegia                                                           | Dx        | G04.1, G11.4, G80.1, G80.2, G81.x, G82.x, G83.0, G83.1x, G83.2x, G83.3x, G83.4, G83.9                                                                                                                                                                                                                                                                                                                                                                                                                                                                                                                                                                                                                                        |
| Moderate or severe renal disease                                                   | Dx        | I12.0, I13.11, I13.2, N03.2, N03.3, N03.5, N03.8, N03.9, N05.2, N05.5, N05.9, N08, N18.x, N19.x, N25.x, Z49.0x, Z49.3x, Z94.0, Z99.2                                                                                                                                                                                                                                                                                                                                                                                                                                                                                                                                                                                         |
| Any malignancy, including lymphoma and leukemia, except malignant neoplasm of skin | Dx        | C00.x-C75.x (except C43.x and C44.x), C81.x-C85.x, C88.x, C90.x, C91.x-C95.x, C96.x, C7A.xxx, C7B.xxx, D00.xx, D01.xx, D02.x, D03.xx, D05.xx, D06.x, D07.xx, D09.xx, D47.9                                                                                                                                                                                                                                                                                                                                                                                                                                                                                                                                                   |
| Moderate or severe liver disease                                                   | Dx        | I85.00, I85.01, I85.10, I85.11, I86.4, K70.4x, K71.1x, K71.7, K72.xx, K76.6, K76.7                                                                                                                                                                                                                                                                                                                                                                                                                                                                                                                                                                                                                                           |
| Metastatic solid tumor                                                             | Dx        | C77.x, C78.x, C79.x, C80.0                                                                                                                                                                                                                                                                                                                                                                                                                                                                                                                                                                                                                                                                                                   |

|             |    |     |
|-------------|----|-----|
| HIV disease | Dx | B20 |
|-------------|----|-----|

Dx: ICD-10-CM (International Classification of Diseases, 10th Revision, Clinical Modification)

Proc: ICD-10-PCS (International Classification of Diseases, 10th Revision, Procedure Coding System)

HIV: human immunodeficiency virus

**eFigure 1. Flowchart of Patient Selection**

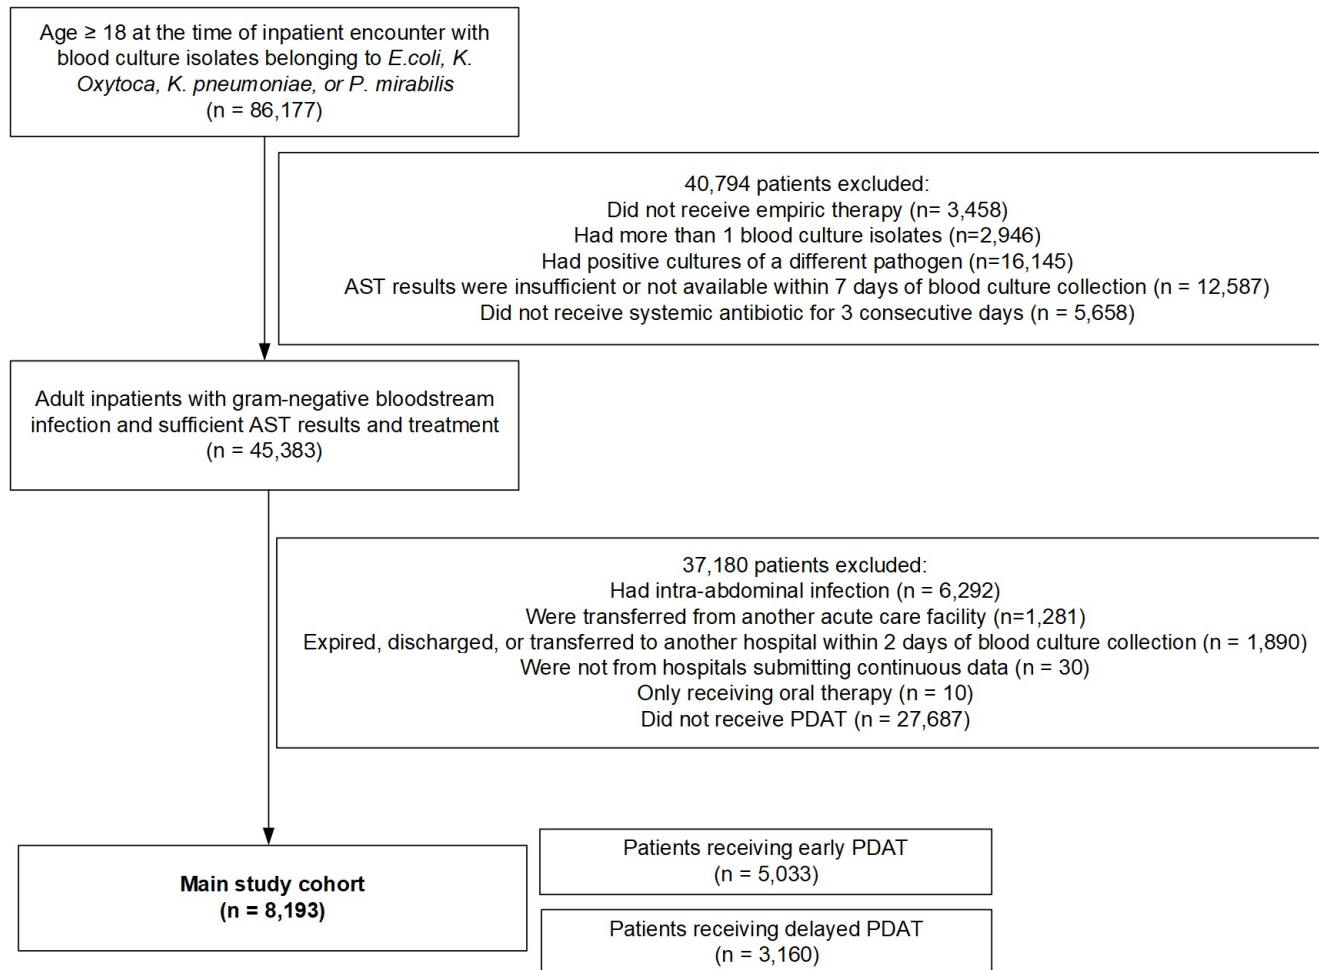

**eFigure 2. Standardized Mean Differences Before and After Inverse Probability Weighting Using Propensity Score**

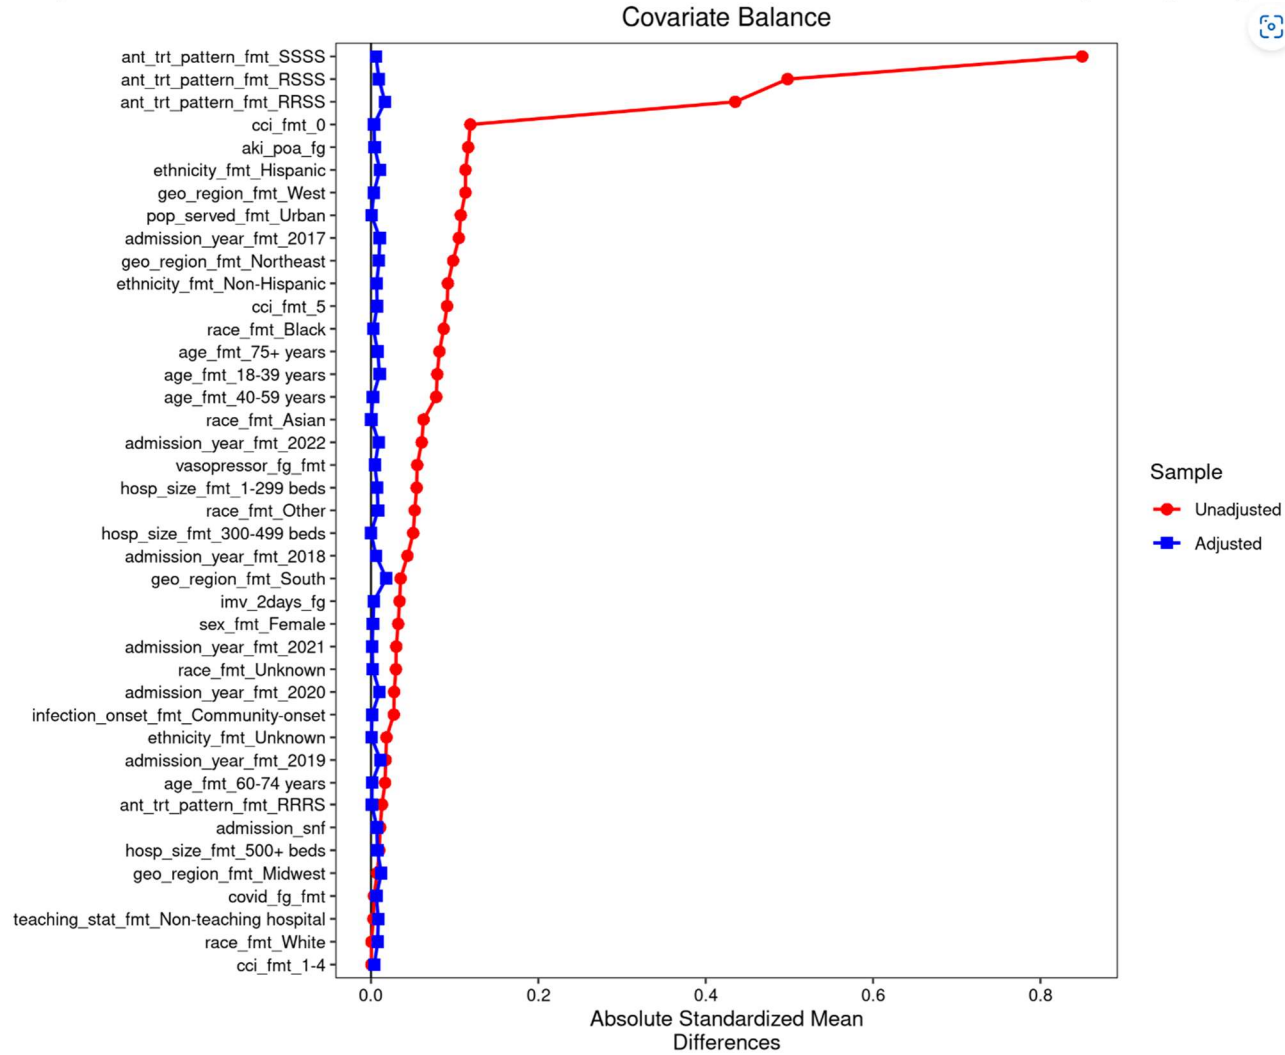

**eFigure 3. First Effective Antibiotic(s) Received, Among Patients Receiving PDAT**

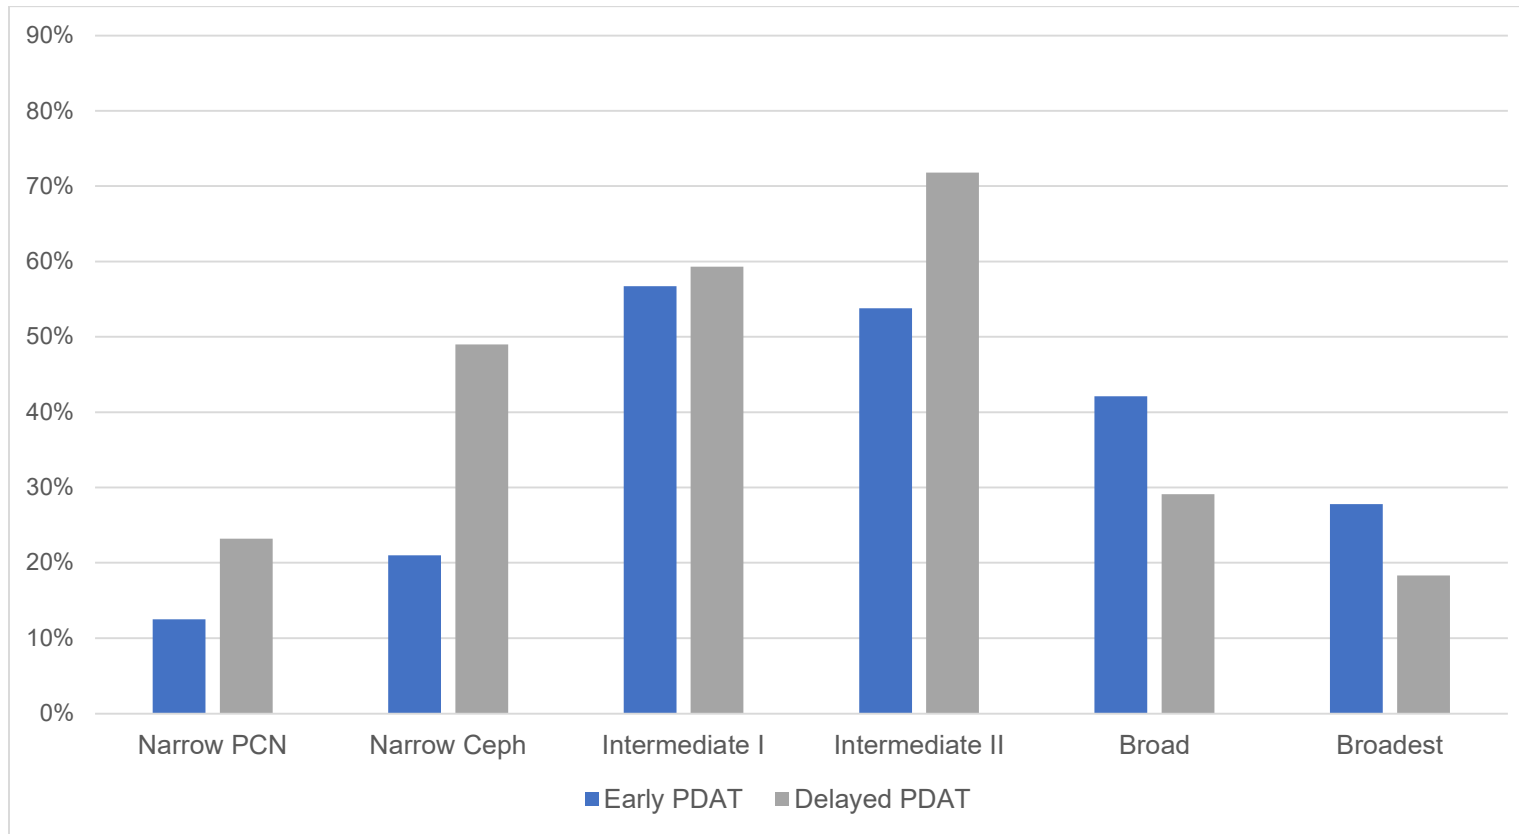

**eFigure 4.** Grid Illustrating the Desirability of Outcome Ranking for the Management of Antimicrobial Therapy (DOOR-MAT) for the Treatment of Bloodstream Infections Caused by *Escherichia coli*, *Klebsiella oxytoca*, *Klebsiella pneumoniae*, or *Proteus mirabilis*

|                                                                                                                 | Phenotype according to:                                                                                                                                                                                                                                                                                                |                |                |                |
|-----------------------------------------------------------------------------------------------------------------|------------------------------------------------------------------------------------------------------------------------------------------------------------------------------------------------------------------------------------------------------------------------------------------------------------------------|----------------|----------------|----------------|
|                                                                                                                 | 1. Narrow-spectrum $\beta$ -lactams (S <sup>1</sup> to any Narrow-Spectrum Penicillins or Narrow-Spectrum Cephalosporins)<br>2. Expanded-spectrum cephalosporin (S to Intermediate I)<br>3. Carbapenem (S to any Broad $\pm$ Intermediate II)<br>4. Novel $\beta$ -lactams/ $\beta$ -lactamase inhibitors (R to Broad) |                |                |                |
| <b>Antibiotic received</b>                                                                                      | <b>S-S-S-S</b>                                                                                                                                                                                                                                                                                                         | <b>R-S-S-S</b> | <b>R-R-S-S</b> | <b>R-R-R-S</b> |
| <b>Narrow-Spectrum Penicillins or Narrow-Spectrum Cephalosporins</b><br>(e.g., cefazolin, ampicillin-sulbactam) | S                                                                                                                                                                                                                                                                                                                      | R              | R              | R              |
| <b>Intermediate I or Oral 3rd-Gen Cephalosporins</b><br>(e.g., ceftriaxone, cefdinir)                           | S                                                                                                                                                                                                                                                                                                                      | S              | R              | R              |
| <b>Intermediate II</b><br>(e.g., Cefepime, Piperacillin-tazobactam)                                             | S                                                                                                                                                                                                                                                                                                                      | S              | S              | R              |
| <b>Broad</b><br>(e.g., Carbapenems)                                                                             | S                                                                                                                                                                                                                                                                                                                      | S              | S              | R              |
| <b>Broadest</b><br>(e.g., ceftazidime-avibactam)                                                                | S                                                                                                                                                                                                                                                                                                                      | S              | S              | S              |

<sup>1</sup>S indicates susceptibility; R indicates resistance

| Category |                         |
|----------|-------------------------|
|          | Desirable (PDAT)        |
|          | Potentially appropriate |
|          | Appropriate but broad   |
|          | Overtreatment           |
|          | Undertreatment          |
