# Supplementary material for: Clinical Outcomes of Early Phenotype-Desirable Antimicrobial Therapy for Enterobacterales Bacteremia
Source: PubMed Central journal article supplement — JAMA Netw Open. 2024 Dec 23;7(12):e2451633. doi: 10.1001/jamanetworkopen.2024.51633 (PMC11667351; doi:10.1001/jamanetworkopen.2024.51633), 2024-12-23
Supplement: jamanetwopen-e2451633-s002.pdf [file jamanetwopen-e2451633-s002.pdf]

## Data Sharing Statement

Moon. Clinical Outcomes of Early Phenotype-Desirable Antimicrobial Therapy for Enterobacterales Bacteremia. *JAMA Netw Open*. Published December 23, 2024. doi:10.1001/jamanetworkopen.2024.51633

### Data

**Data available:** No

### Additional Information

**Explanation for why data not available:** The data that support the findings of this study are available from Premier Inc., but restrictions apply to the availability of these data, which were used under license for the current study, and so are not publicly available.
